# Supplementary material for: Cell type-dependent Erk-Akt pathway crosstalk regulates the proliferation of fetal neural progenitor cells
Source: PubMed Central journal article supplement (PMC4876380; doi:10.1038/srep26547), 2016-05-23
Supplement: srep26547-s1.pdf [file srep26547-s1.pdf]

# **Cell type-dependent Erk-Akt pathway crosstalk regulates the proliferation of fetal neural progenitor cells**

Ji heon Rhim<sup>1,†</sup>, Xiangjian Luo<sup>1,†</sup>, Dongbing Gao<sup>1</sup>, Xiaoyun Xu<sup>1</sup>, Tieling Zhou<sup>1</sup>, Fuhai Li<sup>1,3</sup>, Ping Wang<sup>2,3</sup>,  
Stephen T. C. Wong<sup>1,3</sup>, Xiaofeng Xia<sup>1,3,\*</sup>

<sup>1</sup>Chao Center for BRAIN, Department of Systems Medicine and Bioengineering, <sup>2</sup>Department of Pathology and Genomic Medicine, Houston Methodist Research Institute, Houston, TX 77030

<sup>3</sup>Weill Cornell Medical College, Cornell University, New York, NY 10065

<sup>†</sup>These authors contributed equally to this work

\*Correspondence and requests for materials should be addressed to X.X. (xxia@houstonmethodist.org)

## FIGURES

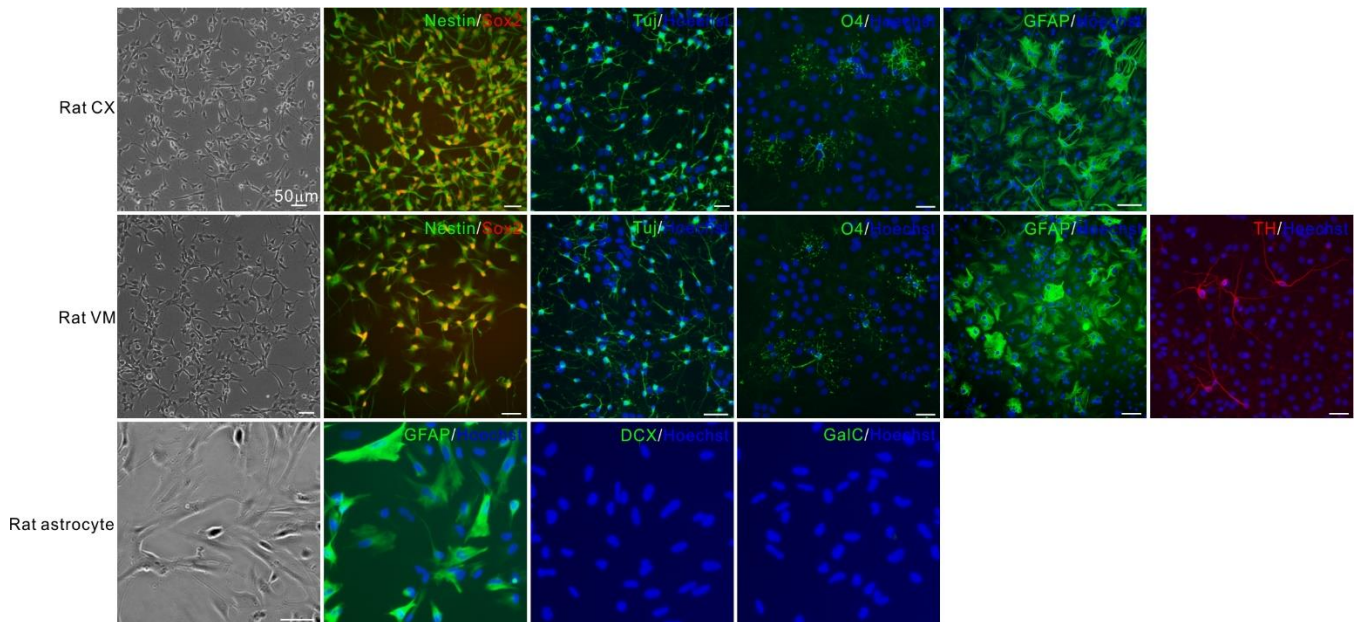

**Supplementary Figure 1. The primary fetal NP cells and astrocytes used in the screen.**

NP cells were primarily cultured from the E18 embryonic rat cortex (rat CX), and E14 embryonic rat ventral mesencephalon (rat VM). Both cell types exhibit typical neural cell morphology (left bright field images) and homogeneously express NP cell markers Nestin and Sox2. The tripotency of the cells were confirmed by their abilities to differentiation into neurons (Tuj+), oligodendrocytes (O4+) and astrocytes (GFAP+). Cells derived from the ventral mesencephalon region can also be differentiated into dopaminergic neurons (TH+). The control astrocytes were cultured from the E19 rat cortex, the majority of the cells (>80%) are GFAP+, DCX+ neurons and GalC+ oligodendrocytes were not detected.

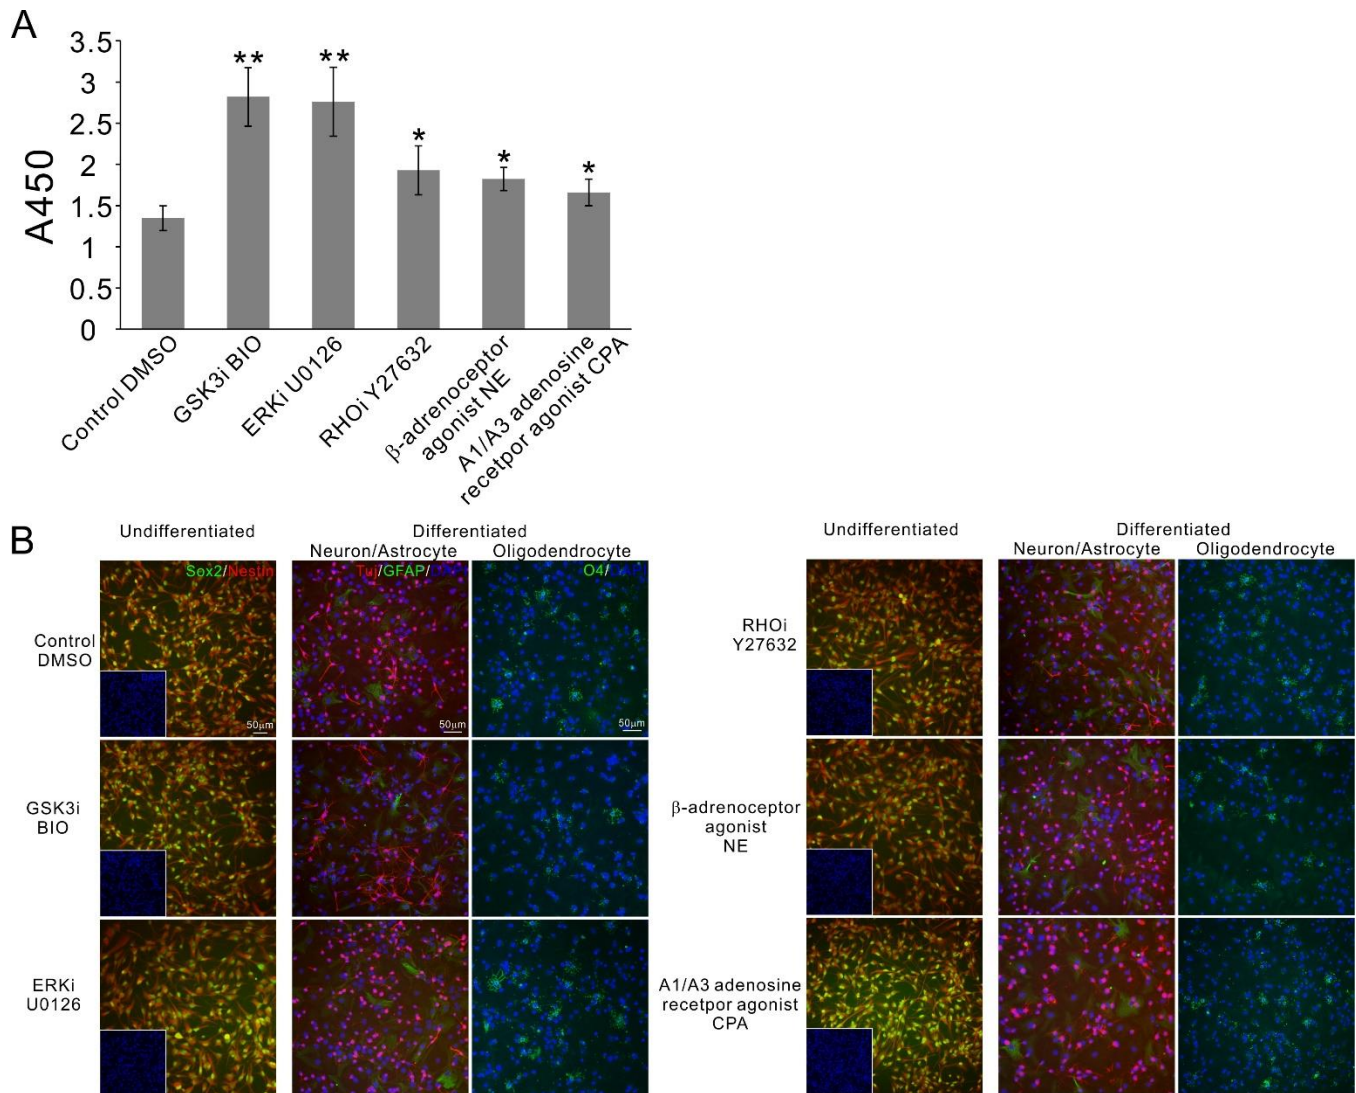

**Supplementary Figure 2. Additional characterization of the compound treated fetal NP cells.**

(A) Confirmation of the high proliferative capability of the compound treated cells by BrdU cell proliferation assay. Rat CX cells were treated with indicated compound for 3 days and chased with BrdU for 4 hours before the assay. (B) Confirmation of the differentiation capability of the compound treated cell. Rat CX cells were treated with the indicated compound for 3 days. Then the cells were either fixed to test the NP cell identify by staining with the Sox2 and nestin antibodies, or differentiated to test the generation of neuron, astrocytes or oligodendrocytes. For the neuron/astrocyte test, cells were differentiated for 2 weeks and stained with the TuJ and GFAP antibodies, for oligodendrocytes, cells were differentiated for 4 weeks and stained with the O4 antibody.

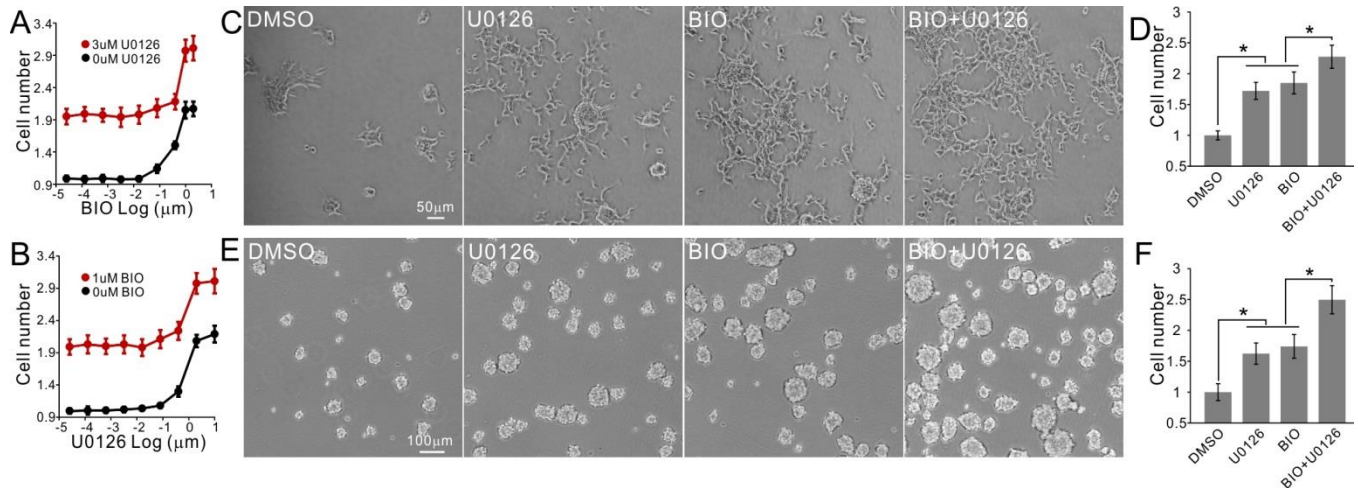

**Supplementary Figure 3. ERKi and GSK3i combinatorial effect on fetal NP cell proliferation.**

(A) Dose response curves of GSK3i BIO, in the presence or absence of 3 μM ERKi U0126. Cells were cultured as monolayer on laminin coated surface. Mean±s.e.m., n=3. (B) Dose response curves of ERKi U0126, in the presence or absence of 1 μM GSK3i BIO. Cells were cultured as monolayer on laminin coated surface. Mean±s.e.m., n=3. (C) Combinatorial effect of ERKi and GSK3i on the proliferation of fetal NP cells cultured in semi-attached condition on gelatin coated surface. (D) Quantification of the number of semi-attached cells after treatment. Mean±s.e.m., n=4. \*, P<0.05. (E) Combinatorial effect of ERKi and GSK3i on the proliferation of fetal NP cells cultured as classical neurospheres. (F) Quantification of the number of neurosphere cells after treatment. Mean±s.e.m., n=3. \*, P<0.05.

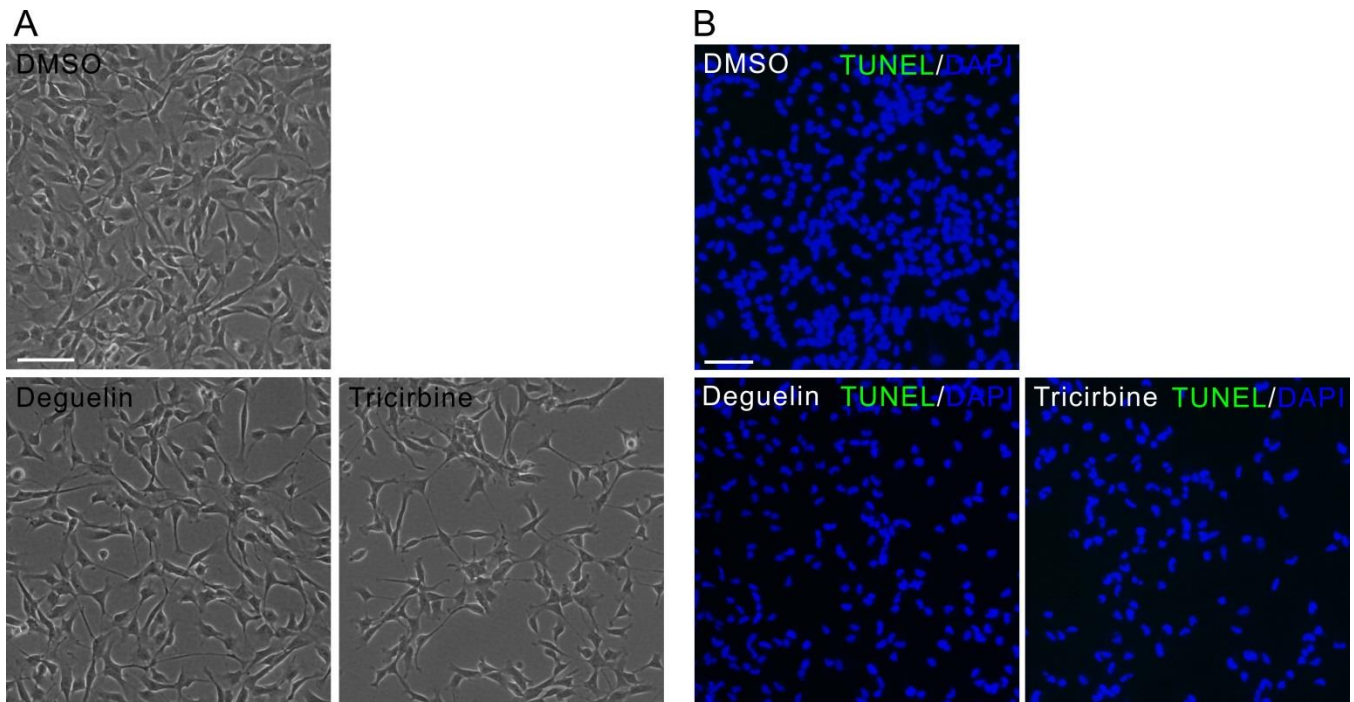

**Supplementary Figure 4. Akt inhibitor treated fetal NP cells.**

(A) The morphology of Rat CX cells treated with 20 nM Deguelin or 500 nM Tricirbine were the same as the control cells, although the cell numbers were reduced. (B) No apoptosis was detected in the Rat CX cells treated with 20 nM Deguelin or 500 nM Tricirbine.

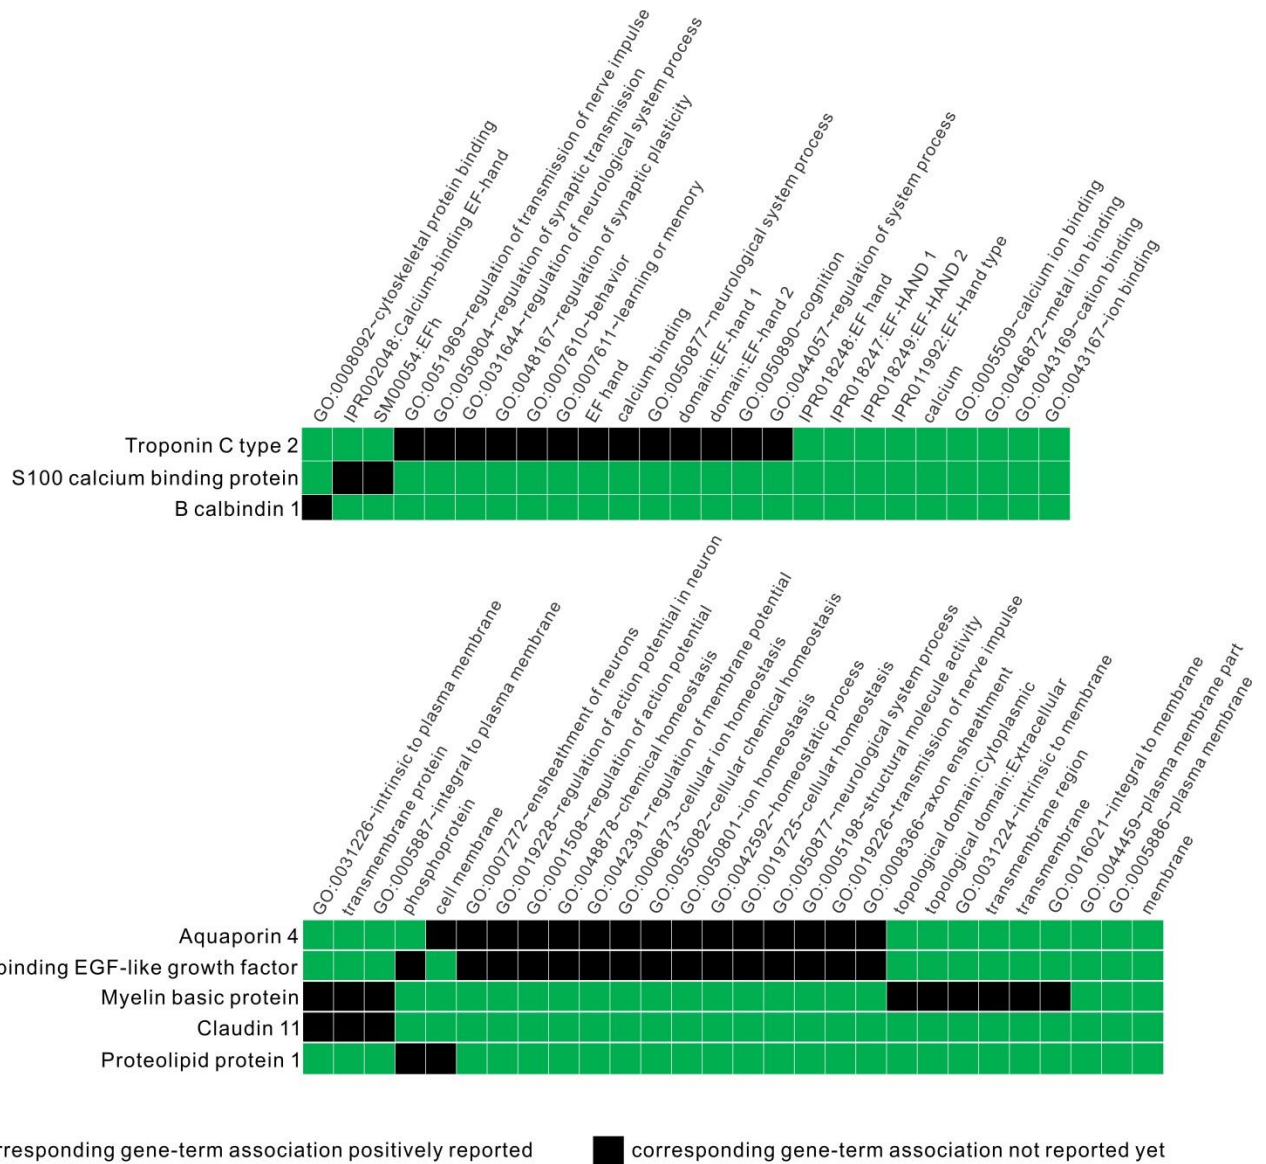

**Supplementary Figure 5. Functional classification of the genes changed by more than 2-fold and  $p < 0.05$ .** Two clusters were identified when the classification stringency was set at the lowest. None of the gene function annotations was associated with the function of NP cells. When medium classification stringency was used no cluster could be detected.

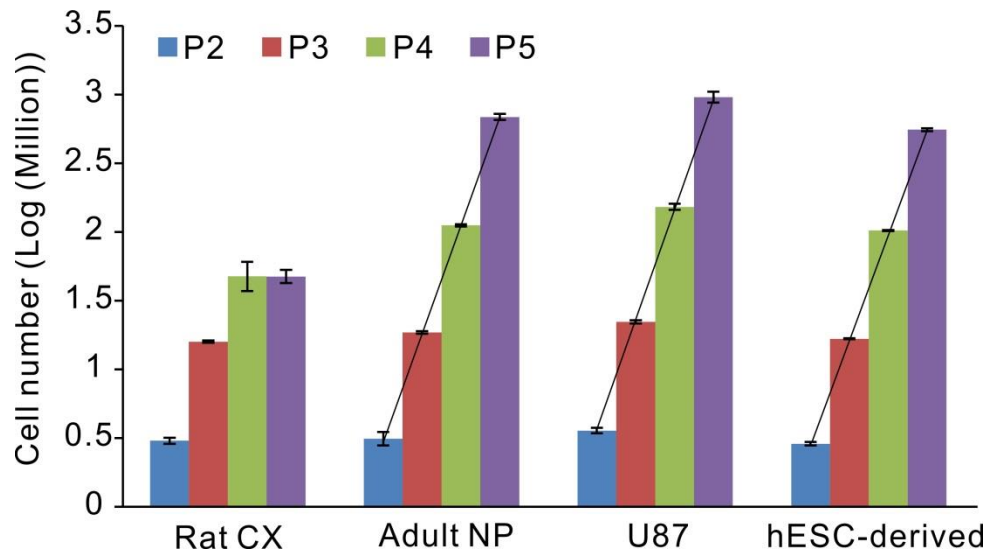

**Supplementary Figure 6. Comparison of the cell proliferative capacity .** For all the cell types the culture was started by seeding 500,000 cells in a T25 flask, and cells were passaged every 3 days. Total cell numbers were counted in every passage. While the proliferation of Rat CX cells gradually decreased, all the other cell types showed constant cell expanding rate as indicated by the straight line fit ( $R > 0.9$  for all 3 cell types).

Figure 2A

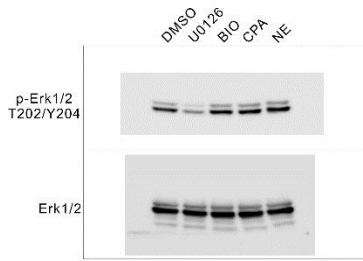

Figure 2C

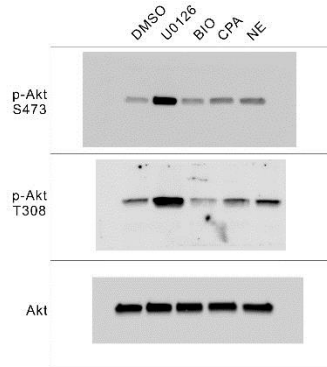

Figure 2D

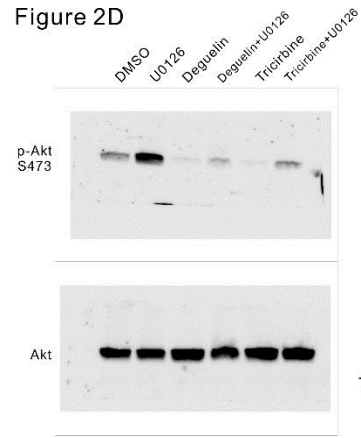

Figure 2F

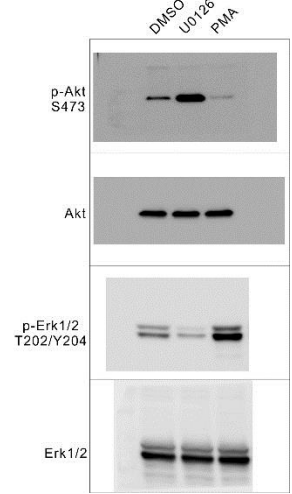

Full length blots for Figure 2



Figure 3A

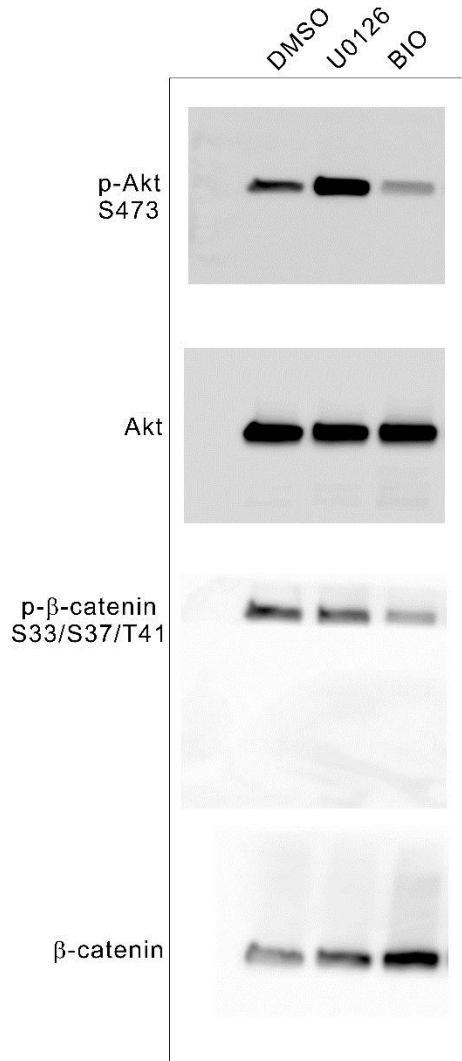

Figure 3B

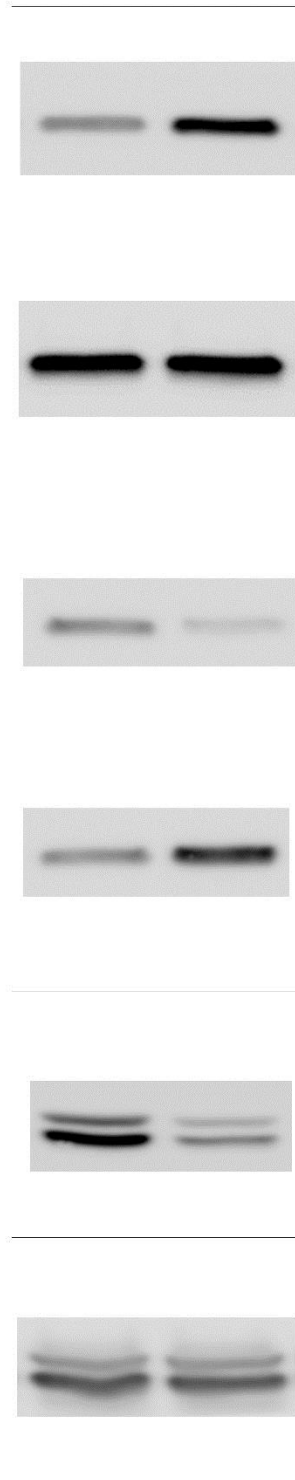

Figure 3C

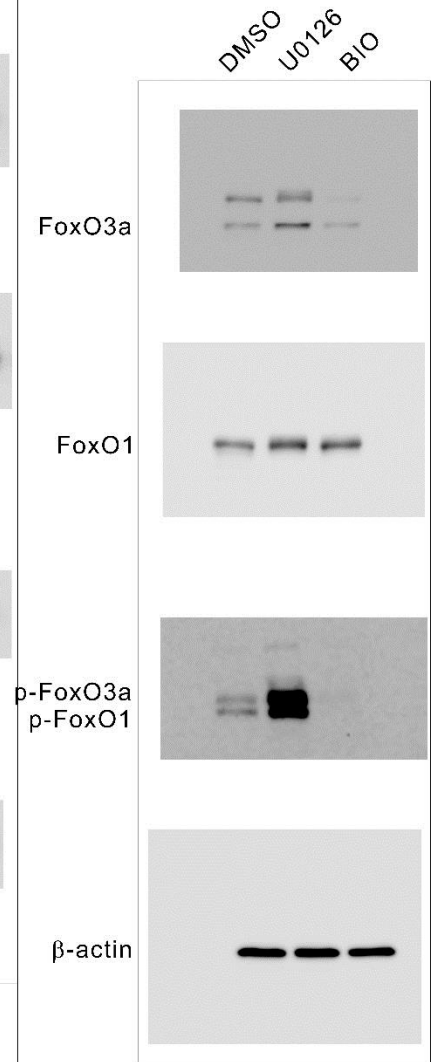

Full length blots for Figure 3

Figure 6A

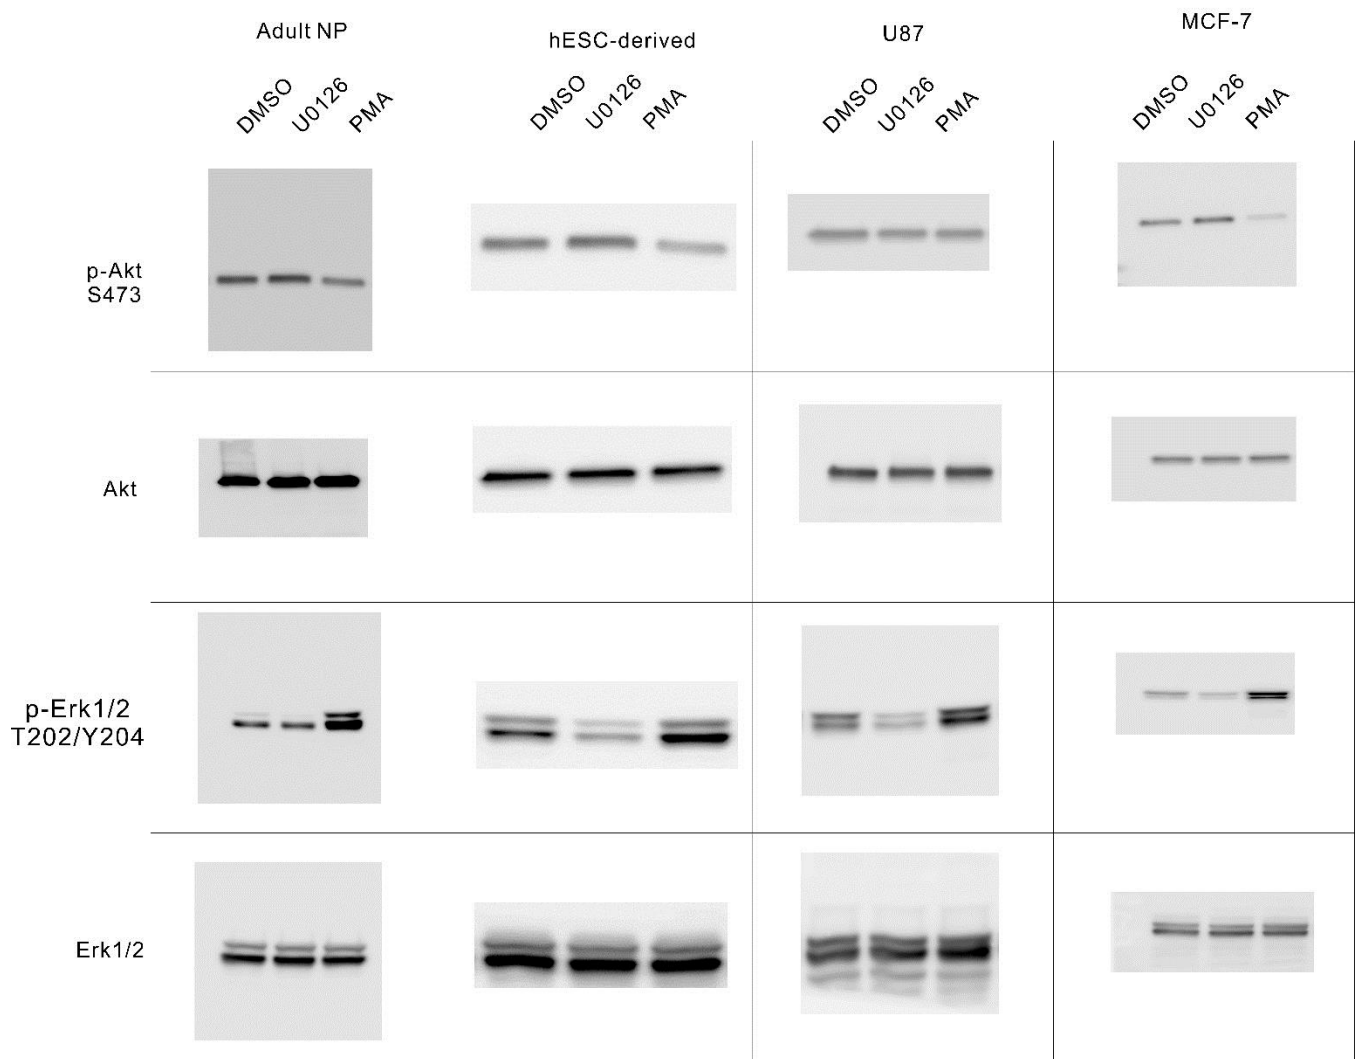

Full length blots for Figure 6

**Supplementary Table 1. Primary screening results**

(Please see the supplementary Excel file)

**Supplementary Table 2. List of the 5 categories of compounds tested in the fetal NP cell proliferation assay**

|                                |                                      |
|--------------------------------|--------------------------------------|
| <b>1. GSK3i</b>                |                                      |
| 1                              | Kenpaullone                          |
| 2                              | SB 216763                            |
| 3                              | SB 415286                            |
| 4                              | Indirubin-3'-oxime                   |
| 5                              | NSC 693868                           |
| 6                              | TCS 2002                             |
| 7                              | BIO                                  |
| 8                              | Indirubin                            |
| <b>2. ERKi</b>                 |                                      |
| 1                              | PD 198306                            |
| 2                              | PD 98059                             |
| 3                              | U0126                                |
| 4                              | SL 327                               |
| 5                              | FR 180204                            |
| <b>3. RHOi</b>                 |                                      |
| 1                              | Fasudil hydrochloride                |
| 2                              | HA 1100 hydrochloride                |
| 3                              | H-89·2HCl                            |
| 4                              | Y-27632·2HCl                         |
| <b>4. Adrenoceptor</b>         |                                      |
| <b>Epinephrines</b>            |                                      |
| 1                              | (-)-alpha-Methylnorepinephrine       |
| 2                              | (-)-Epinephrine bitartrate           |
| 3                              | (ñ)-Epinephrine hydrochloride        |
| 4                              | (ñ)-Norepinephrine (+)bitartrate     |
| 5                              | 6-Fluoronorepinephrine hydrochloride |
| 6                              | EPINEPHRINE BITARTRATE               |
| 7                              | ETHYLNOREPINEPHRINE HYDROCHLORIDE    |
| 8                              | L(-)-Norepinephrine bitartrate       |
| 9                              | NOREPINEPHRINE                       |
| 10                             | Racepinephrine HCl                   |
| <b>β Adrenoceptor agonists</b> |                                      |
| 11                             | (-)-Isoproterenol hydrochloride      |
| 12                             | (ñ)-CGP-12177A hydrochloride         |
| 13                             | Albuterol hemisulfate                |
| 14                             | Amiodarone hydrochloride             |
| 15                             | BAMBUTEROL HYDROCHLORIDE             |
| 16                             | BRL 37344 sodium                     |

|                                       |                                      |
|---------------------------------------|--------------------------------------|
| 17                                    | CLENBUTEROL HYDROCHLORIDE            |
| 18                                    | Dobutamine hydrochloride             |
| 19                                    | Dopamine hydrochloride               |
| 20                                    | FENOTEROL HYDROBROMIDE               |
| 21                                    | Formoterol                           |
| 22                                    | Formoterol fumarate                  |
| 23                                    | Isotharine mesylate                  |
| 24                                    | Isoxsuprine hydrochloride            |
| 25                                    | Levalbuterol hydrochloride           |
| 26                                    | Metaproterenol hemisulfate           |
| 27                                    | Nylidrin hydrochloride               |
| 28                                    | PRONETALOL HYDROCHLORIDE             |
| 29                                    | R(-)-Denopamine                      |
| 30                                    | RACTOPAMINE HYDROCHLORIDE            |
| 31                                    | Ritodrine hydrochloride              |
| 32                                    | Salbutamol                           |
| 33                                    | Salmeterol                           |
| 34                                    | SOTALOL HYDROCHLORIDE                |
| 35                                    | TERBUTALINE HEMISULFATE              |
| 36                                    | Tolazoline hydrochloride             |
| 37                                    | Tulobuterol                          |
| 38                                    | Tulobuterol hydrochloride            |
| 39                                    | Xamoterol hemifumarate               |
| <b>5. Adenosine receptor</b>          |                                      |
| <b>A1 Adenosine receptor agonists</b> |                                      |
| 1                                     | N6-Phenyladenosine                   |
| 2                                     | N6-Cyclohexyladenosine               |
| 3                                     | (S)-ENBA                             |
| 4                                     | 2-Chloro-N6-cyclopentyladenosine     |
| 5                                     | GR 79236                             |
| 6                                     | 2'-MeCCPA                            |
| 7                                     | SDZ WAG 994                          |
| 8                                     | (ñ)-5'-Chloro-5'-deoxy-ENBA          |
| 9                                     | GR 79236X                            |
| 10                                    | N6-Cyclopentyladenosine              |
| 11                                    | R(-)-N6-(2-Phenylisopropyl)adenosine |
| 12                                    | N6-2-Phenylethyladenosine            |
| 13                                    | 2-Chloroadenosine                    |
| 14                                    | NECA                                 |
| <b>A3 Adenosine receptor agonists</b> |                                      |
| 15                                    | N6-2-(4-Aminophenyl)ethyladenosine   |
| 16                                    | AB-MECA                              |
| 17                                    | Chloro-IB-MECA                       |
| 18                                    | IB-MECA                              |

|    |              |
|----|--------------|
| 19 | 2-Cl-IB-MECA |
| 20 | HEMADO       |
| 21 | PARAXANTHINE |

**Supplementary Table 3. Gene expression microarray analysis of the U0126 maintained fetal rat NP cells.** Listed are 39 genes with >2 fold-change and p<0.05 compared to the DMSO treated control cells. Among them only 2 genes were detected with >5 fold-change and p<0.05.

| Column # | Column ID    | Gene Symbol     | Setup p-value<br>U0126 VS DMSO | Fold-Change<br>U0126 VS DMSO |
|----------|--------------|-----------------|--------------------------------|------------------------------|
| 18987    | 1386911_at   | Atp1a2          | 0.00150736                     | 2.45383                      |
| 1502     | 1368945_at   | Bmp2            | 0.00150736                     | -2.41756                     |
| 1540     | 1368983_at   | Hbegf           | 0.00228979                     | -2.58584                     |
| 4752     | 1372195_at   | Tnnc2           | 0.00404317                     | 2.0035                       |
| 17579    | 1385036_at   | Sncaip          | 0.00228979                     | 2.15817                      |
| 601      | 1368044_at   | Scg2            | 0.0114234                      | -2.18562                     |
| 4747     | 1372190_at   | Aqp4            | 0.00194798                     | 5.1752                       |
| 9720     | 1377163_at   | Inhbb           | 0.00228979                     | 2.67659                      |
| 14651    | 1382096_at   | Cmtm5           | 0.0063135                      | 2.1029                       |
| 19345    | 1387269_s_at | Plaur           | 0.00697212                     | -2.08465                     |
| 30164    | 1398270_at   | Bmp2            | 0.0063135                      | -2.26887                     |
| 5958     | 1373401_at   | Tnc             | 0.00673994                     | -2.57399                     |
| 9126     | 1376569_at   | Klf2            | 0.00228979                     | 7.01989                      |
| 2428     | 1369871_at   | Areg            | 0.00649444                     | -2.71592                     |
| 812      | 1368255_at   | Ntm             | 0.00380677                     | 3.32253                      |
| 18979    | 1386903_at   | S100b           | 0.009744                       | 2.16091                      |
| 18511    | 1386041_a_at | Klf2            | 0.00380677                     | 2.1152                       |
| 16024    | 1383469_at   | Aldh1a3         | 0.00659896                     | -3.2607                      |
| 916      | 1368359_a_at | Vgf             | 0.031652                       | -2.3789                      |
| 23108    | 1391032_at   | Sez6            | 0.0139575                      | 2.08186                      |
| 637      | 1368080_at   | LOC683573, Rgcc | 0.00977453                     | 2.7299                       |
| 6841     | 1374284_at   | Rassf4          | 0.00745996                     | 2.53916                      |
| 23669    | 1391593_at   | Rassf4          | 0.00745996                     | 2.26684                      |
| 2356     | 1369799_at   | Abat            | 0.00831502                     | 2.01407                      |
| 18824    | 1386637_at   | Fgl2            | 0.0214911                      | 2.22846                      |
| 4719     | 1372162_at   | Acss1           | 0.039431                       | 2.01388                      |
| 9268     | 1376711_at   | Cldn11          | 0.0195411                      | 2.27277                      |
| 2758     | 1370201_at   | Calb1           | 0.0485793                      | -2.27002                     |
| 127      | 1367570_at   | Tagln           | 0.0286546                      | 2.0586                       |
| 328      | 1367771_at   | Tsc22d3         | 0.0111509                      | 2.06463                      |
| 1367     | 1368810_a_at | Mbp             | 0.0412499                      | 5.41606                      |
| 16071    | 1383516_at   | Fgl2            | 0.0450496                      | 2.59077                      |
| 134      | 1367577_at   | Hspb1           | 0.0234176                      | 2.82885                      |
| 27688    | 1395794_at   | Tpm1            | 0.0343841                      | 2.32783                      |
| 25983    | 1393911_at   | Sh3bp4          | 0.0103316                      | 2.03081                      |
| 8707     | 1376150_at   | S1pr3           | 0.0149166                      | 2.19557                      |

|       |            |        |           |         |
|-------|------------|--------|-----------|---------|
| 24970 | 1392894_at | Fgl2   | 0.0377373 | 2.52617 |
| 19188 | 1387112_at | Plp1   | 0.0462915 | 4.15581 |
| 5256  | 1372699_at | Zfp775 | 0.0187706 | 2.02251 |



**Supplementary Table 4. Affymetrix GeneChip Rat Genome 230 2.0 array raw data.**

(Please see the supplementary Excel file)

**Supplementary Movie 1.** Time-lapse comparison of control and ERKi treated Rat CX cells. The mitosis events were circled. Images were taken every 15 minutes for about 2.5 days.

(Please see the supplementary video file)
